# Supplementary material
Source: publisher figshare collection journal article supplement (https://acs.figshare.com/ndownloader/files/4419109)
Supplement: Supplementary file 1 [file 4419109]

## Supporting Information

### Activation and Alteration of Base Selectivity by Metal Cations in the Functionality-Transfer Reaction for RNA Modification

Kazumitsu Onizuka, Yosuke Taniguchi, Shigeki Sasaki,\*

Graduate School of Pharmaceutical Sciences, Kyushu University, 3-1-1 Maidashi,  
Higashi-ku, Fukuoka 812-8582, Japan, and CREST, Japan Science and  
Technology Agency.

sasaki@phar.kyushu-u.ac.jp

|                                                                             |     |
|-----------------------------------------------------------------------------|-----|
| Figure 9S. HPLC analysis of the hydrolysates of the modified ORN2F(Me, Ph). | S-2 |
| Figure 10S. Metal cation effects on the reaction with DNA substrate         | S-3 |
| Figure 11S. Base selectivity with DNA substrates                            | S-4 |
| Figure 12S. Comparison of the reactivity of guanine analogs                 | S-5 |
| Table 2S. MALDI-TOF/MS data of all DNA and RNA                              | S-7 |

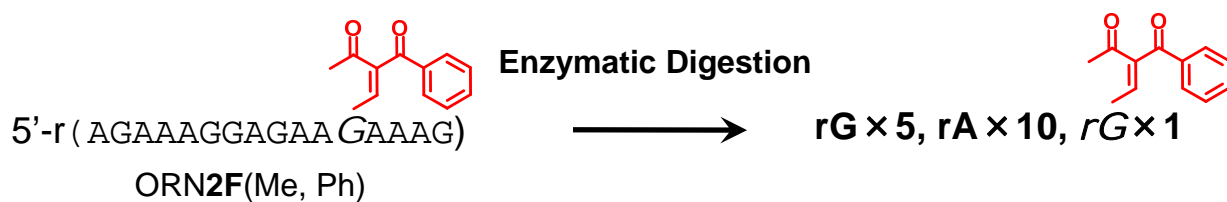

Transfer modified ORN2F (10  $\mu$ M) was hydrolyzed with BAP (30 U/ml) and SVPD (2.0 U/ml) at 37°C for 1h, and the mixture was analyzed by HPLC (Column: SHISEIDO C18, 4.6 x 250 mm; Solvent: A: 50 mM HCOONH<sub>4</sub> Buffer, B: CH<sub>3</sub>CN, B: 5% to 40% /30 min, linear gradient; Flow rate: 1.0 ml/min; monitored by UV detector at 254 nm).

➤ **Hydrolysate of the Ni<sup>2+</sup>-activated transfer reaction product**

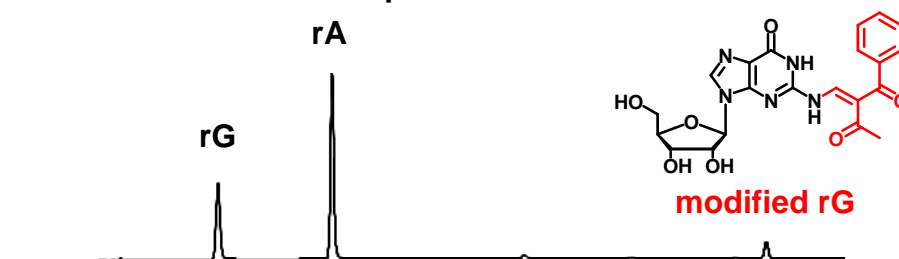

➤ **Hydrolysate of the transfer reaction product at pH 9.6**

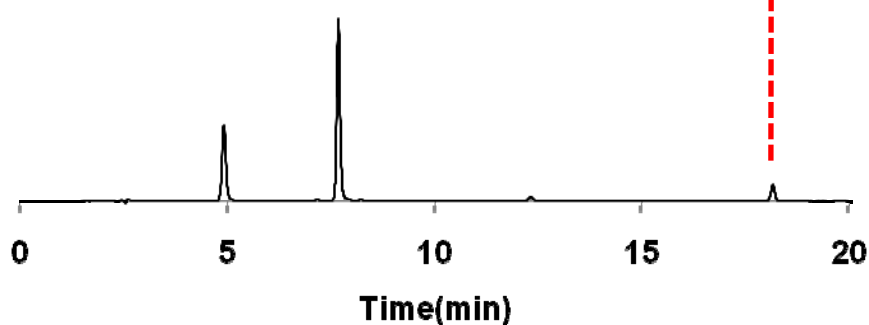

**Figure 9S.** HPLC analysis of the hydrolysates of the modified ORN2F(Me, Ph). The modified rG was isolated and subjected to ESI-HRMS measurements (calcd for C<sub>21</sub>H<sub>21</sub>N<sub>5</sub>O<sub>7</sub> (M+Na)<sup>+</sup>: 478.1333, found: 478.1351). Determination of the 2-amino modified structure of the transfer reaction at pH 9.6 has been discussed in the previous study (19).

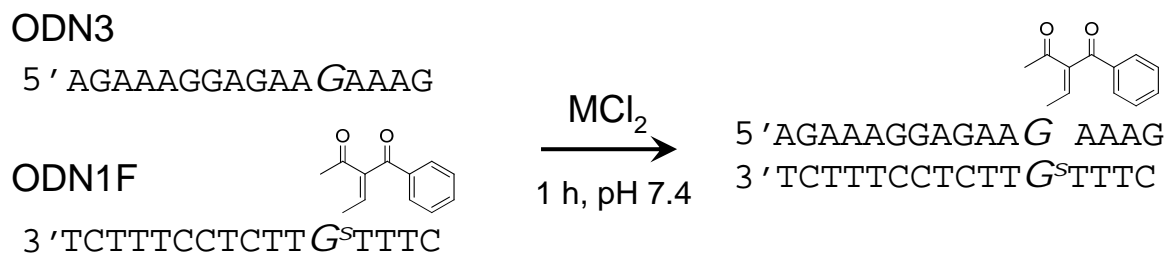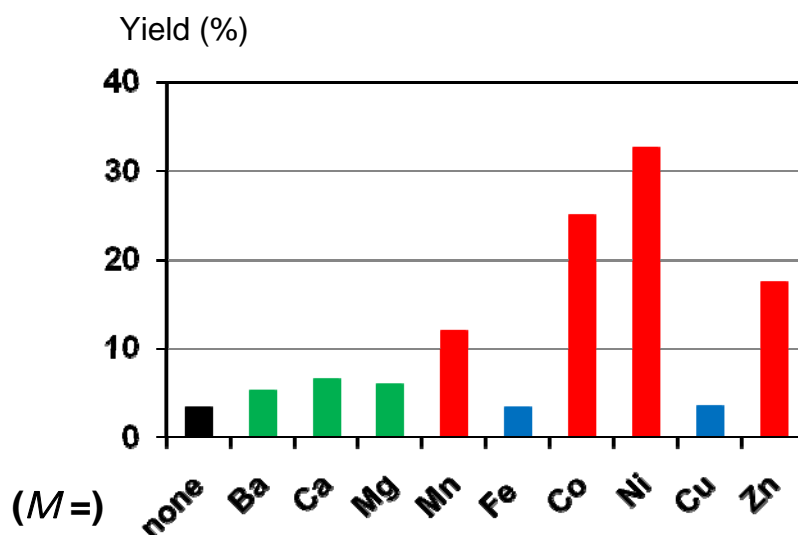

**Figure 10S.** Metal cation effect on the functionality transfer reaction with DNA substrate. The transfer reactions were performed by using 15  $\mu\text{M}$  of *S*-functionalized ODN1F-G<sup>S</sup>(Me, Ph) and 10  $\mu\text{M}$  of the target ODN3 (G) in 50 mM MES buffer containing 100 mM NaCl in the presence of 1 mM  $\text{MCl}_2$  at pH 7.4 for 1h, and followed by HPLC.

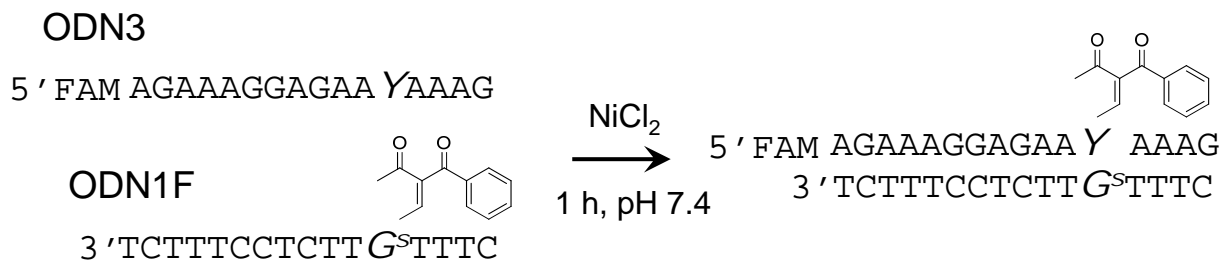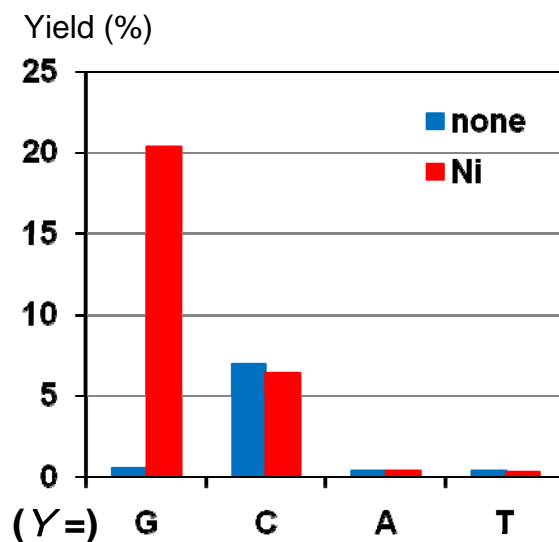

**Figure 11S.** Base selectivity of transfer reaction with DNA substrates in the presence of  $\text{NiCl}_2$ . The transfer reactions were performed by using  $1.5\text{ }\mu\text{M}$  of *S*-functionalized ODN1- $\text{G}^{\text{S}}$ (Me, Ph) and  $1.0\text{ }\mu\text{M}$  of the target ODN3 (Y) in  $50\text{ mM}$  MES buffer containing  $100\text{ mM}$  NaCl at pH 7.4 for 1h, and followed by HPLC (monitored by monitoring the FAM fluorescence). Blue bars indicate the reaction yield in the absence of  $\text{NiCl}_2$ , and red bars indicate the reaction yield in the presence of  $1\text{ mM}$   $\text{NiCl}_2$ .

ODN3

5' AGAAAGGAGAA Y AAAG

ODN1F

3' TCTTTCCTCTT G<sup>S</sup> TTTC

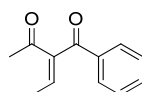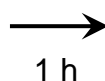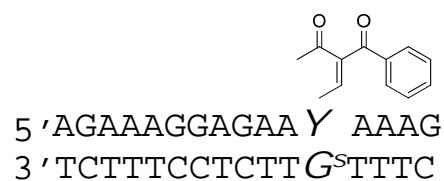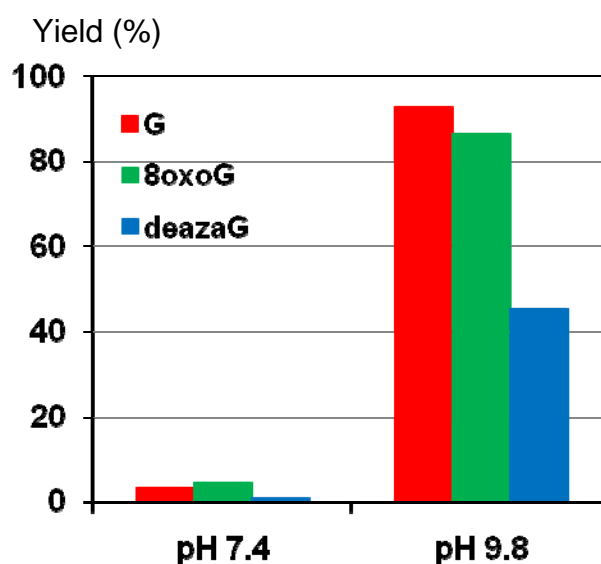

**Figure 12S.** Comparison of the reactivity of the guanine analogs under alkaline conditions. The transfer reactions were performed by using 15  $\mu$ M of *S*-functionalized ODN1F-G<sup>S</sup>(Me, Ph) and 10  $\mu$ M of the target ODN3 (Y) in 50 mM carbonate buffer containing 100 mM NaCl at pH 9.8 for 1h, and followed by HPLC.

**Table 1S.** MALDI-TOF/MS Data of all ODN and ORN compounds used in this study.

| DNA or RNA | 5' Label | X or Y                      | Calcd ([M-H] <sup>-</sup> ) | Found  |
|------------|----------|-----------------------------|-----------------------------|--------|
| ODN1       |          | X = G <sup>S</sup>          | 4767.8                      | 4766.5 |
| ODN1F      |          | X = G <sup>S</sup> (Me, Ph) | 4939.7                      | 4939.4 |
| ODN1F      |          | X = G <sup>S</sup> (H, Ph)  | 4897.8                      | 4898.8 |
| ORN2       |          | Y = rG                      | 5297.8                      | 5297.8 |
| ORN2       | FAM      | Y = rG                      | 5835.9                      | 5835.9 |
| ORN2       | FAM      | Y = rC                      | 5795.9                      | 5795.1 |
| ORN2       | FAM      | Y = rA                      | 5819.9                      | 5819.5 |
| ORN2       | FAM      | Y = rU                      | 5796.9                      | 5796.5 |
| ORN2F      |          | Y = rG(Me, Ph)              | 5469.8                      | 5469.9 |
| ODN3       | FAM      | Y = dG                      | 5579.1                      | 5579.5 |
| ODN3       | FAM      | Y = dC                      | 5539.1                      | 5538.7 |
| ODN3       | FAM      | Y = dA                      | 5563.1                      | 5563.5 |
| ODN3       | FAM      | Y = dT                      | 5554.1                      | 5553.7 |
| ODN3       |          | Y = dG                      | 5041.9                      | 5041.6 |
| ODN3       |          | Y = 8oxodG                  | 5057.9                      | 5056.8 |
| ODN3       |          | Y = deazadG                 | 5040.1                      | 5040.1 |
| ODN3F      |          | Y = dG(Me, Ph)              | 5214.0                      | 5213.6 |
| ODN3F      |          | Y = 8oxodG(Me, Ph)          | 5230.0                      | 5229.9 |
| ODN3F      |          | Y = deazadG(Me, Ph)         | 5212.1                      | 5212.4 |
